# Supplementary material
Source: bioRxiv or medRxiv preprint supplement (https://www.biorxiv.org/highwire/filestream/86063/field_highwire_adjunct_files/2/280347-3.pdf)
Supplement: Supplementary file [file 280347-3.pdf]

A

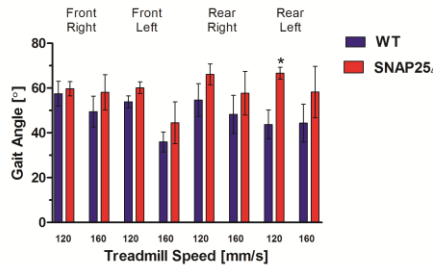

B

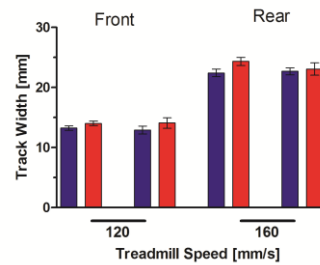

C

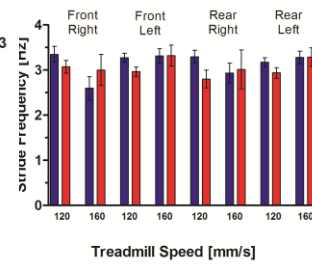

D

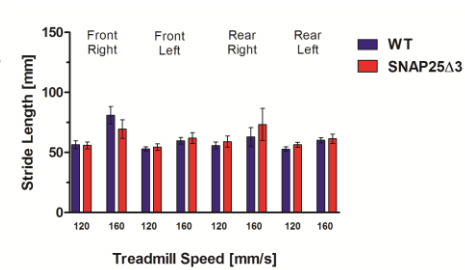

E

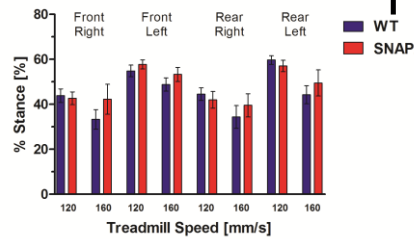

F

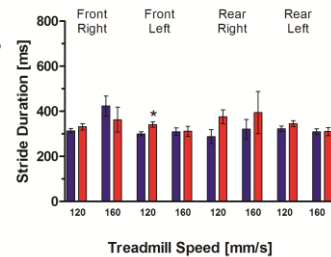

G

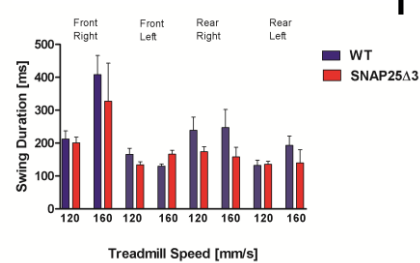

H

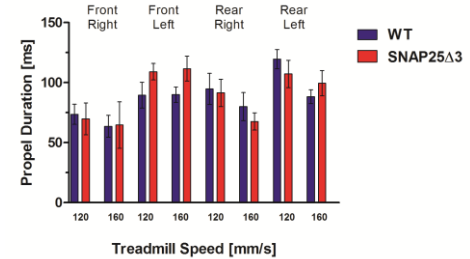

I

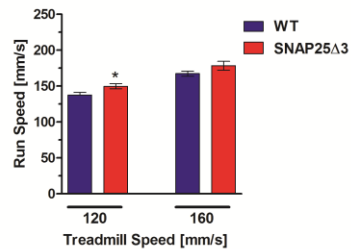

**Supplementary Figure S3.** Additional gait parameters studied in the SNAP25 $\Delta$ 3 homozygote.
